# Supplementary material for: Identification of QTL hot spots for malting quality in two elite breeding lines with distinct tolerance to abiotic stress
Source: PubMed Central journal article supplement (PMC5987402; doi:10.1186/s12870-018-1323-4), 2018-06-04

**Additional file 1: Figure S1.** Frequency distribution of the BLUEs of the 100 DH for the measured traits. The black arrows indicate the values of parents Sofiara (S) and Victoriana (V).

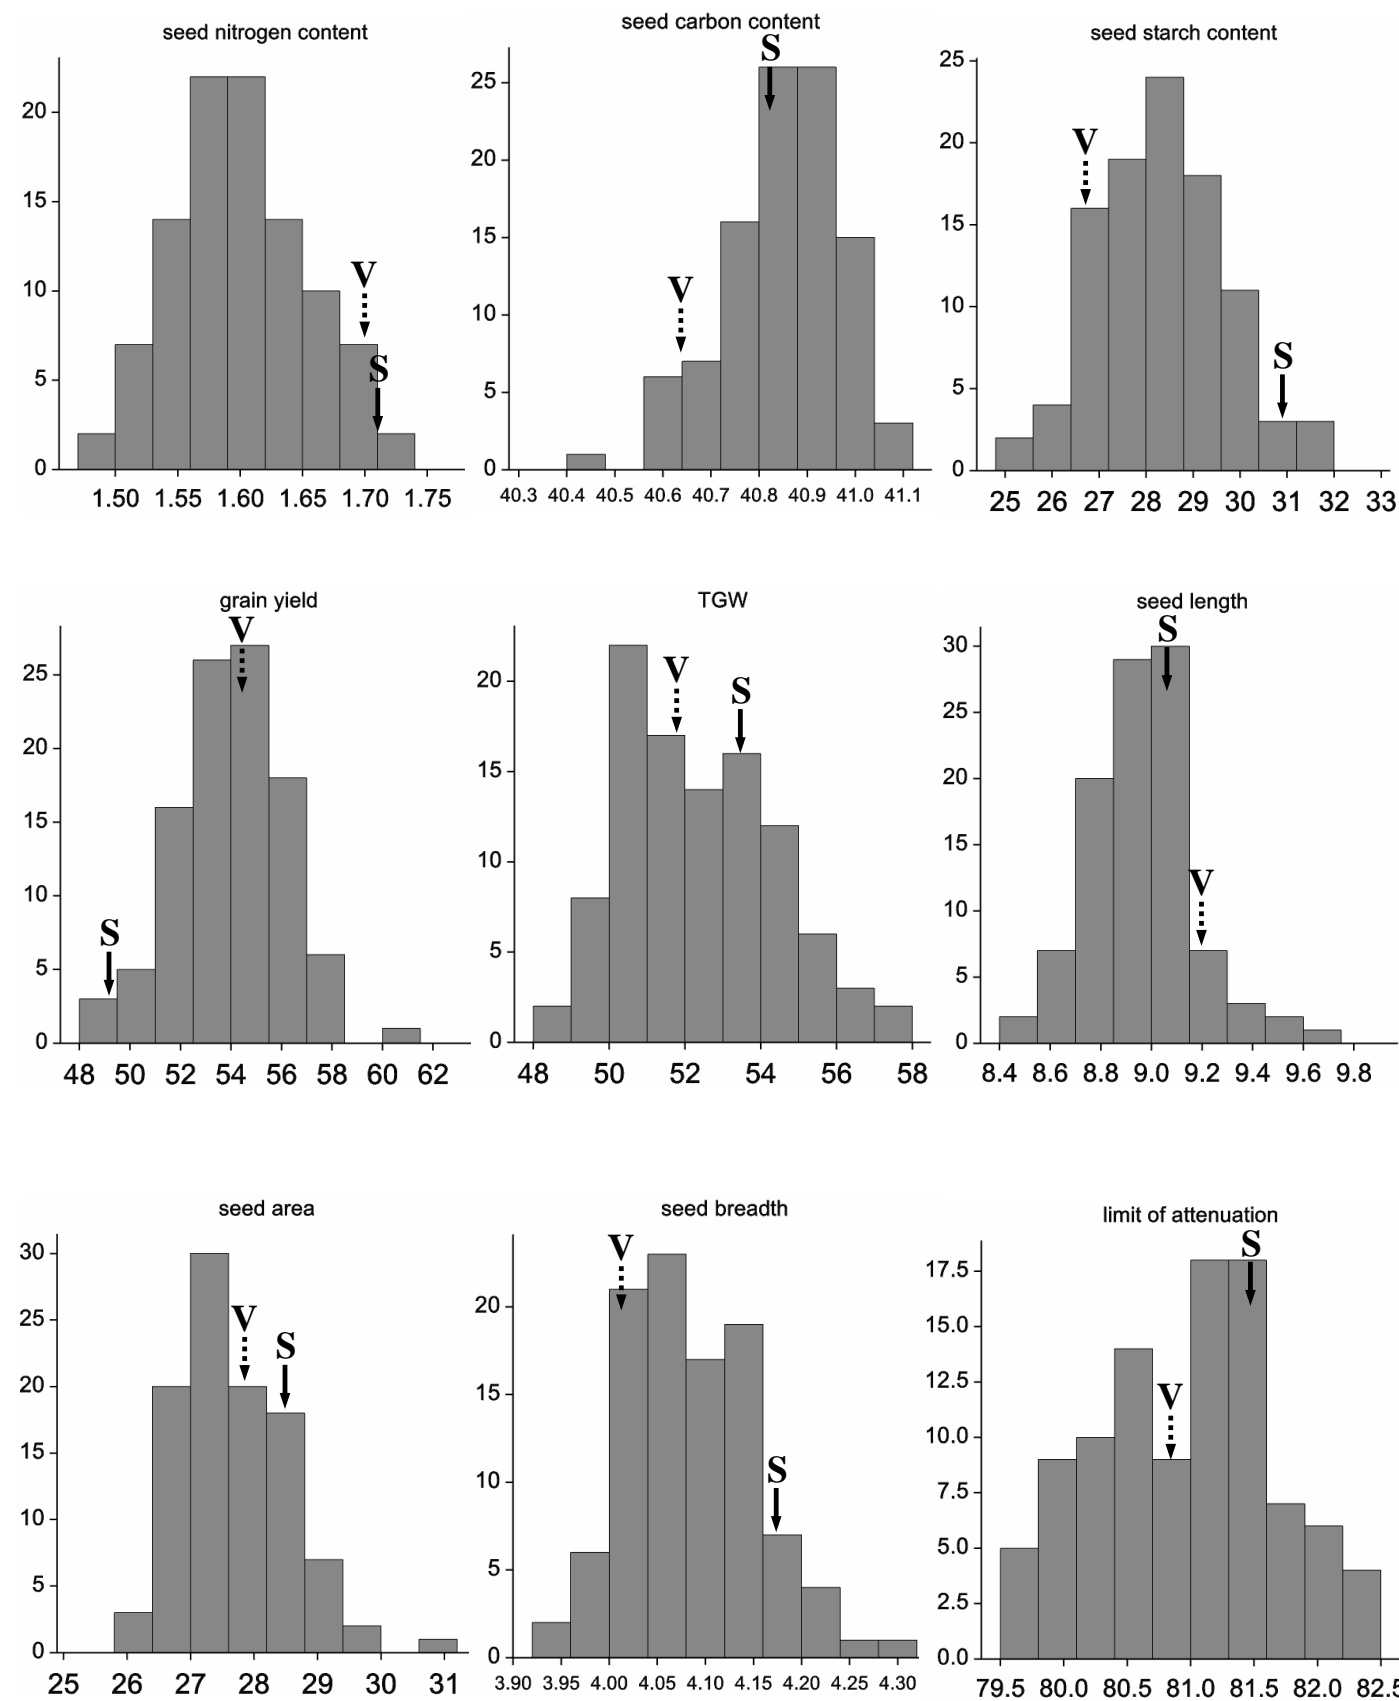

beta-glucan

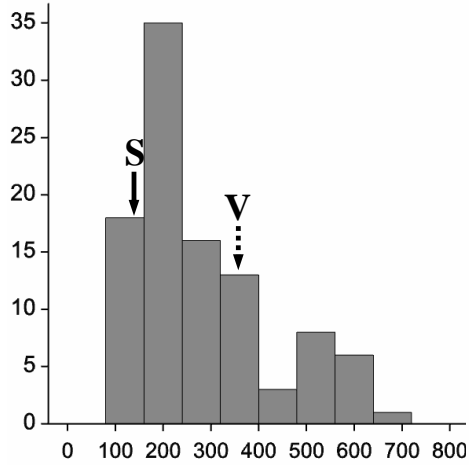

fine grind extract

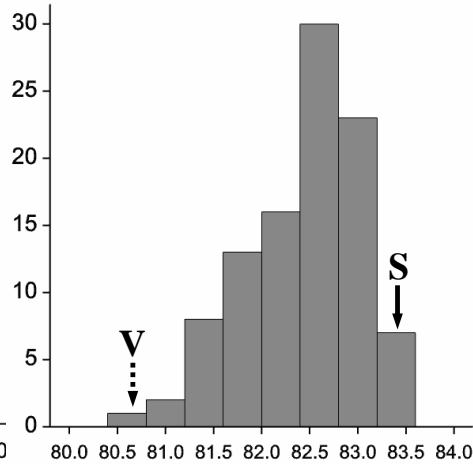

friability

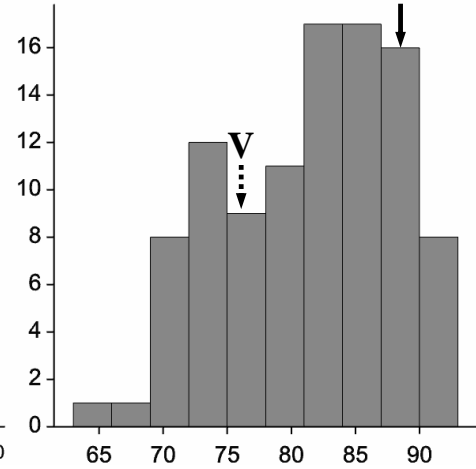

kolbach index

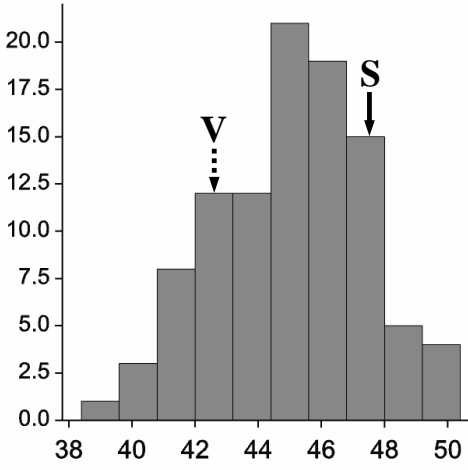

moisture content

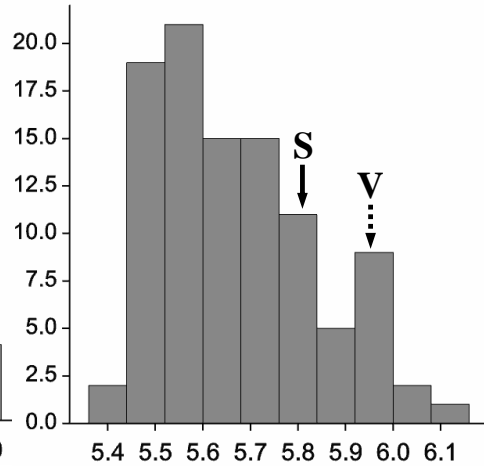

protein content

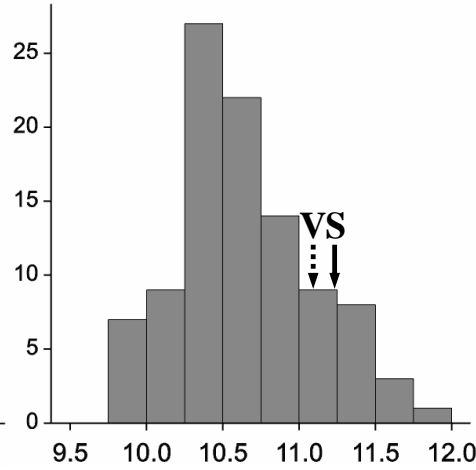

respiration losses

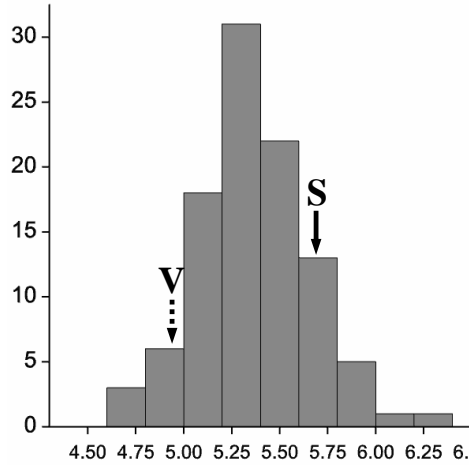

rootlet losses

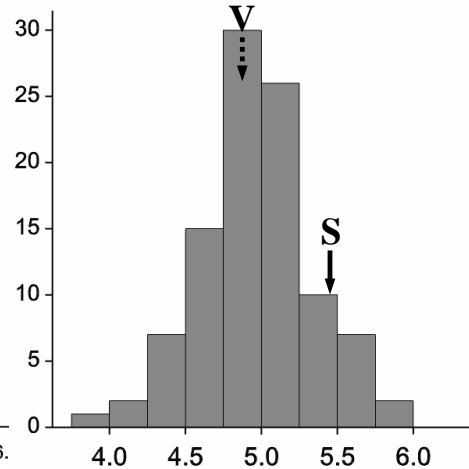

soluble nitrogen

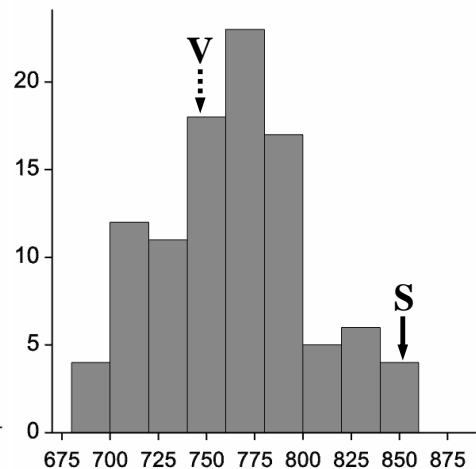

total malting losses

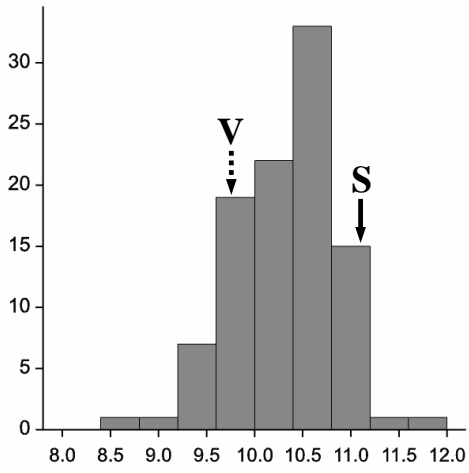

viscosity

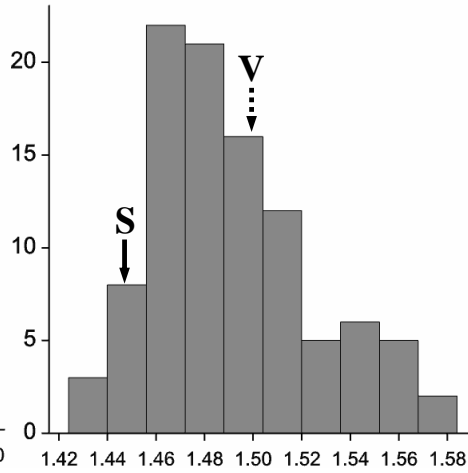

plant height

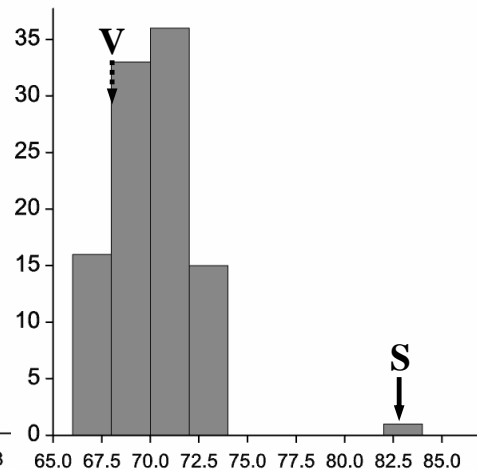

flowering time

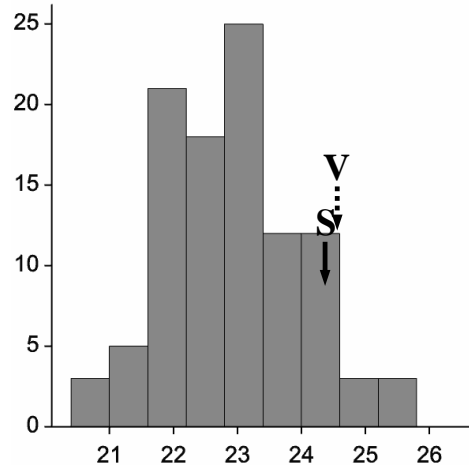

Supplement: 12870_2018_1323_MOESM1_ESM.pdf [file 12870_2018_1323_MOESM1_ESM.pdf]
