# Supplementary material for: Identification of QTL hot spots for malting quality in two elite breeding lines with distinct tolerance to abiotic stress
Source: PubMed Central journal article supplement (PMC5987402; doi:10.1186/s12870-018-1323-4), 2018-06-04
Supplement: 12870_2018_1323_MOESM4_ESM.pdf [file 12870_2018_1323_MOESM4_ESM.pdf]

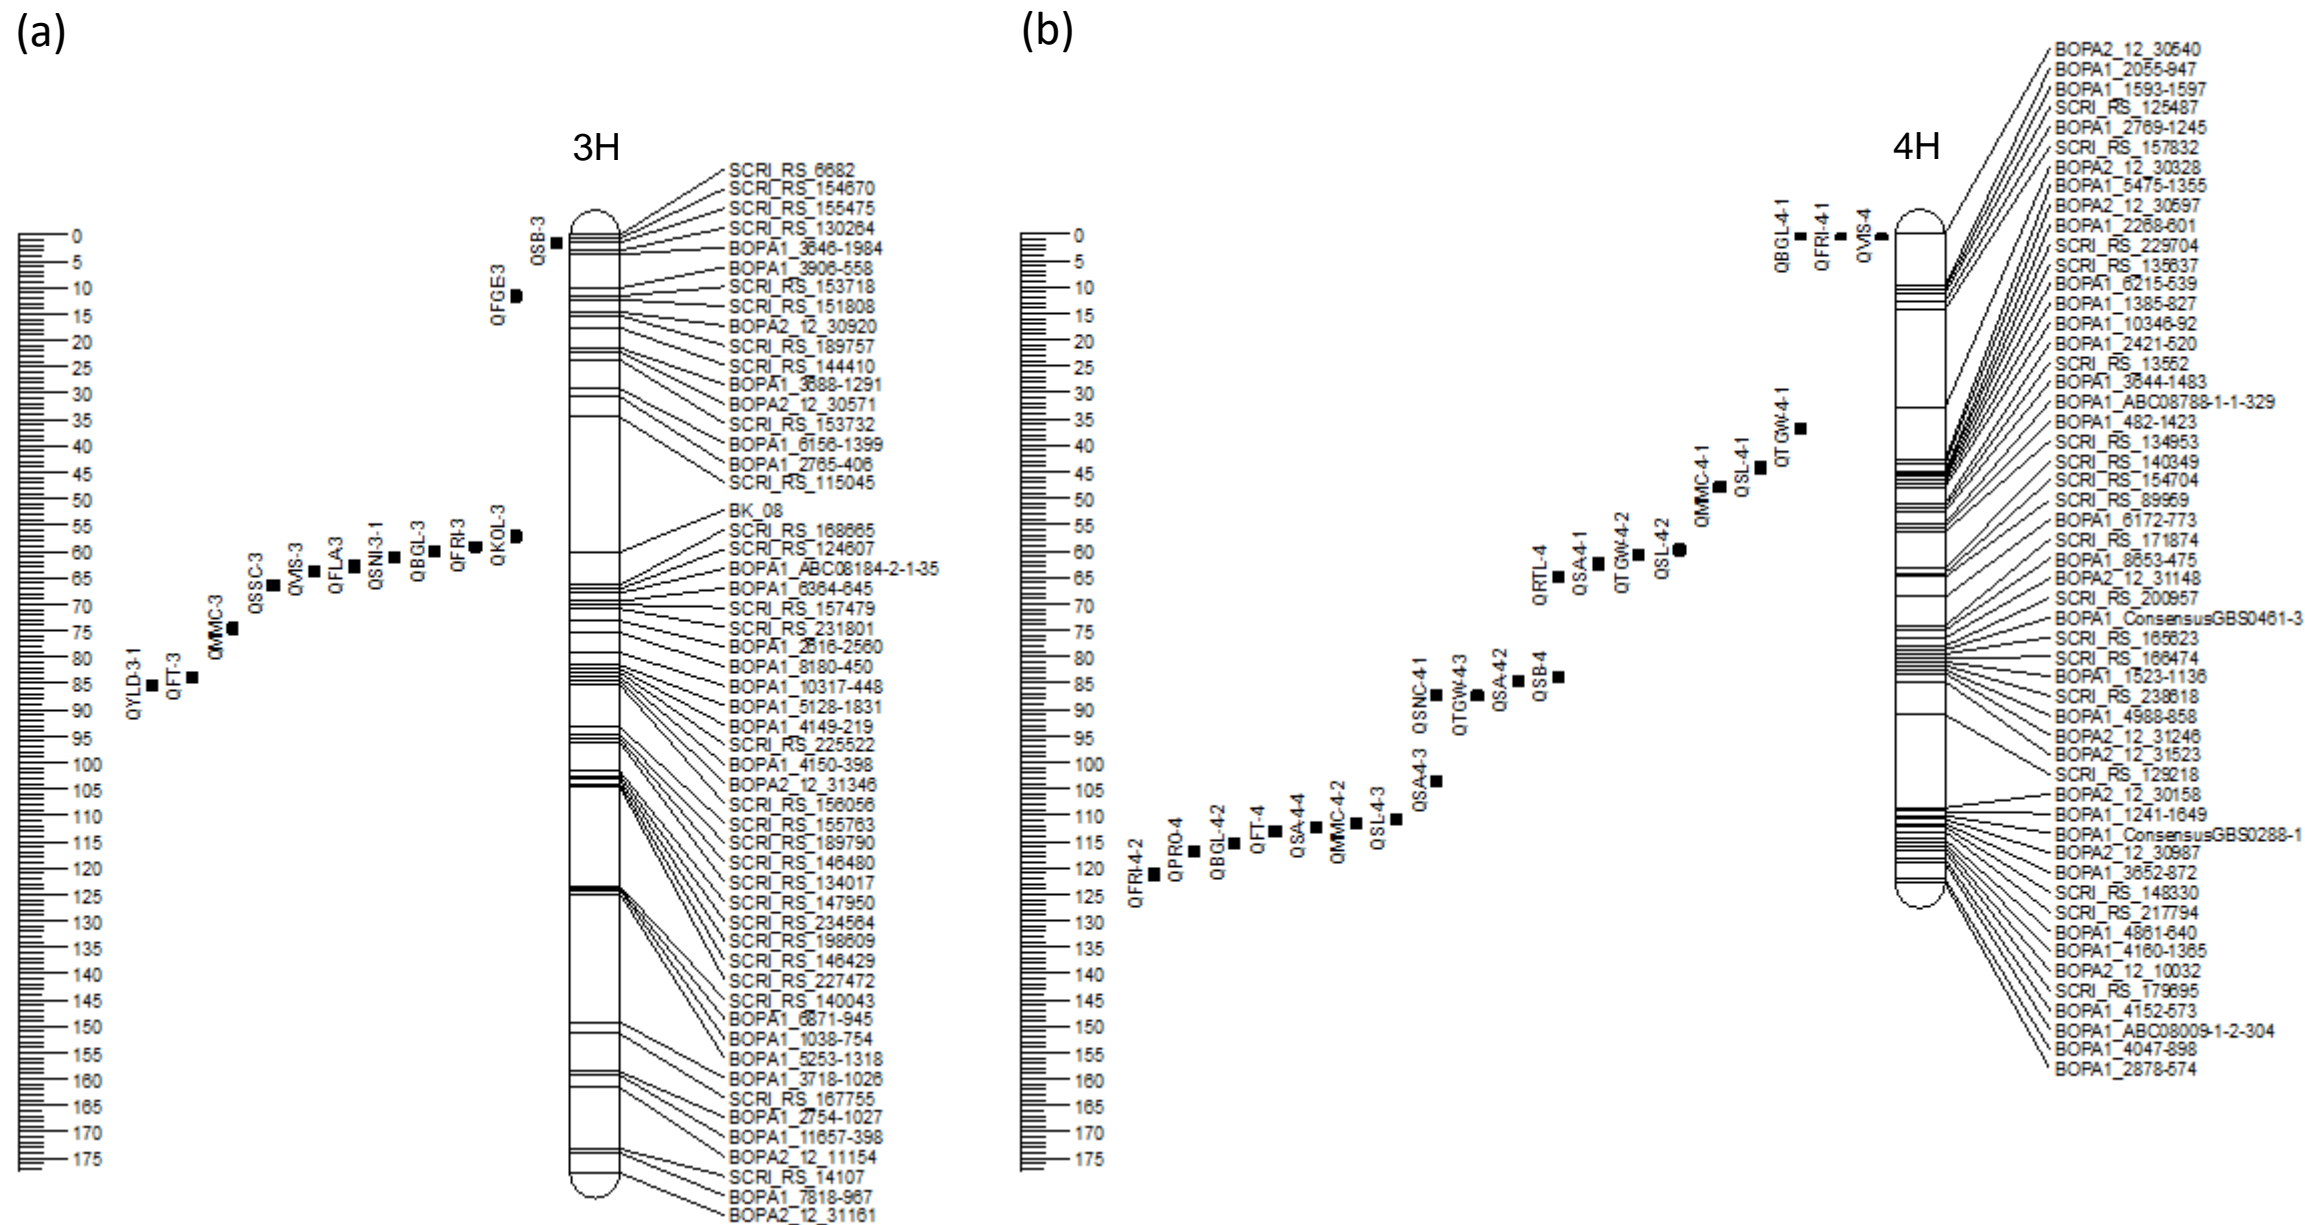

Additional file 2: Figure S2. Locations of main-effect QTL on 3H (a) and 4H (b) chromosomes.
