# Supplementary material for: Identification of QTL hot spots for malting quality in two elite breeding lines with distinct tolerance to abiotic stress
Source: PubMed Central journal article supplement (PMC5987402; doi:10.1186/s12870-018-1323-4), 2018-06-04

**Additional file 3: Figure S3.** Climate conditions in rainfed field located in Wohlde (a-b), Walewice (c-d) and Gatersleben (e). Moisture content of soil in the field in Gatersleben location (f). Bars represent rainfall and lines – Temperature (a-e).

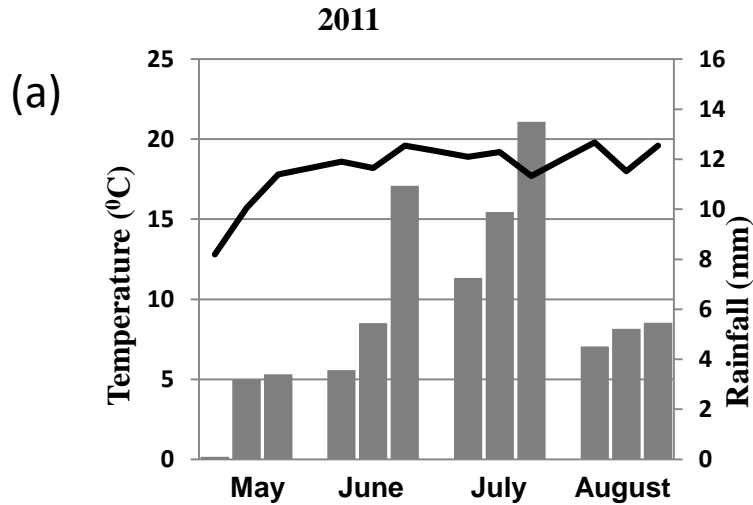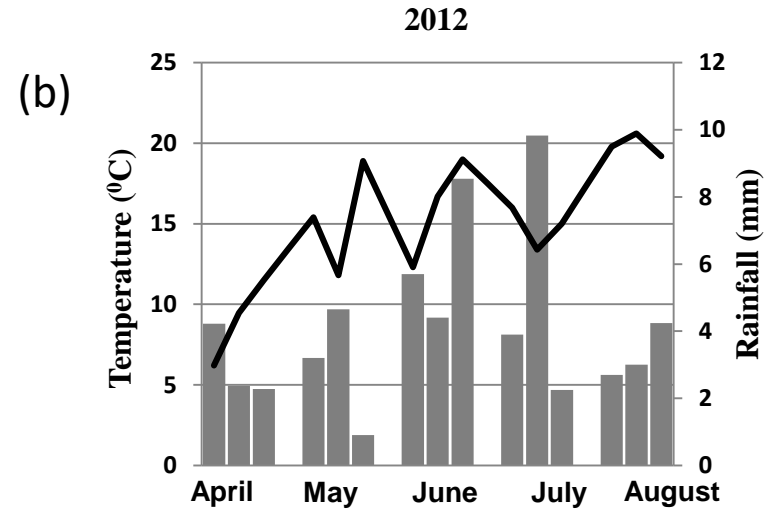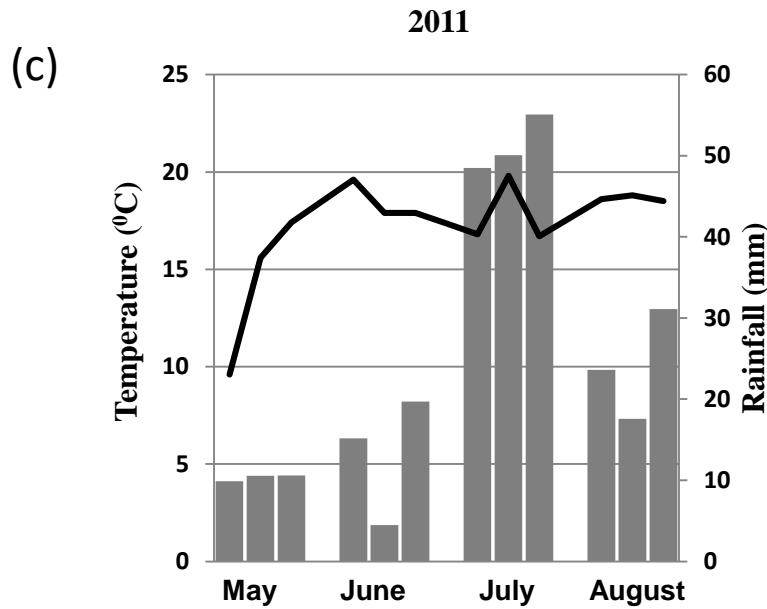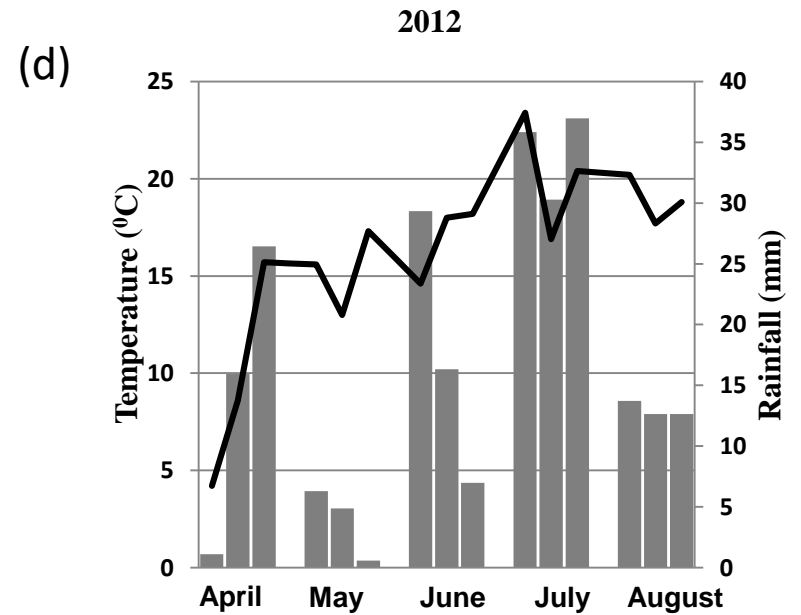

(e)

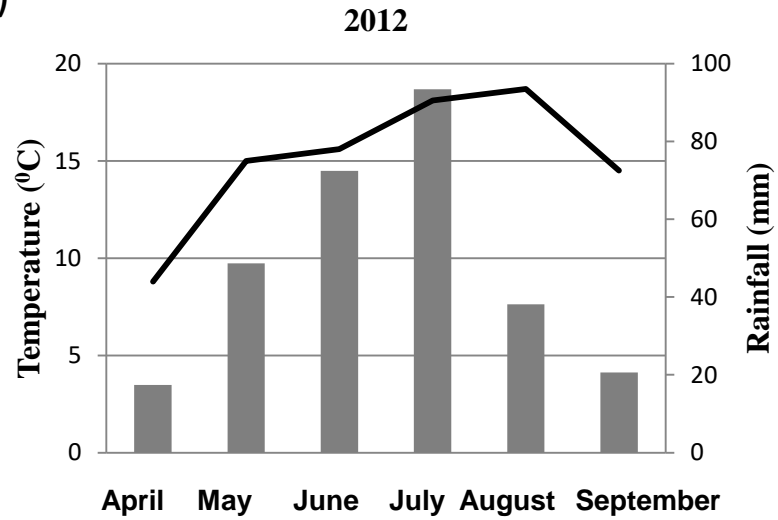

(f)

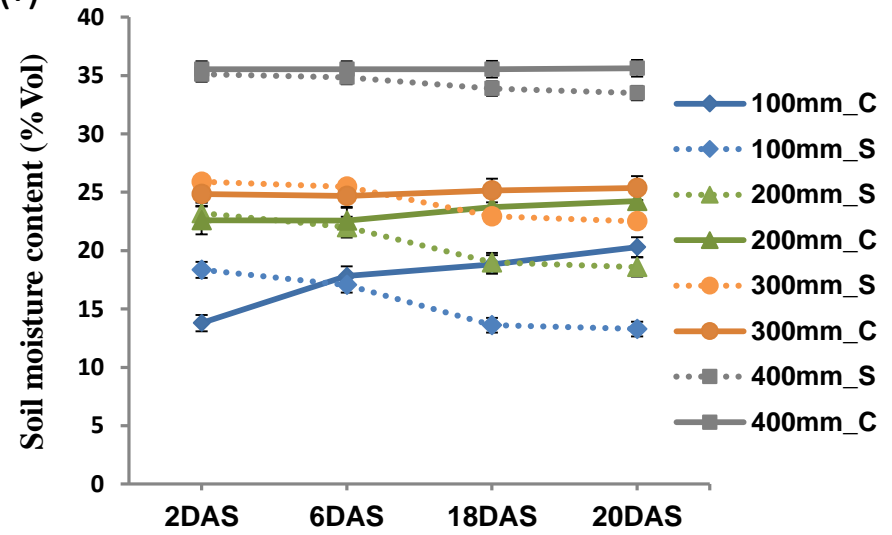

Supplement: 12870_2018_1323_MOESM6_ESM.pdf [file 12870_2018_1323_MOESM6_ESM.pdf]
